# Supplementary material for: CuCl-mediated tandem CO insertion and annulation of 1,4-dilithio-1,3-dienes: formation of multiply substituted cyclopentadienones and/or their head-to-head dimers
Source: Royal Society of Chemistry journal article supplement (doi:10.1039/b719007g), 2008-01-01
Supplement: b719007g.pdf [file b719007g.pdf]

**Supporting Information for**  
*CuCl-Mediated tandem CO insertion and annulation of*  
*1,4-dilithio-1,3-dienes: formation of multiply*  
*substituted cyclopentadienones and/or their head-to-head*  
*dimers*

Qian Luo, Chao Wang, Wen-Xiong Zhang and Zhenfeng Xi\*

*Contents*

1. Experimental details and characterization data for all compounds.
2. Copies of  $^1\text{H}$  NMR and  $^{13}\text{C}$  NMR spectra for all new compounds.
3. X-ray crystallographic studies of **3a** and **3d**.

## 1. Experimental details and characterization data for all new compounds.

**General Methods.** All reactions were conducted under a slightly positive pressure of dry, prepurified nitrogen using standard Schlenk line techniques when appropriate. Unless otherwise noted, all starting materials were commercially available and were used without further purification. Diethyl ether was refluxed and distilled from sodium/benzophenone ketyl under a nitrogen atmosphere. 1,4-Dihalo-1,3-butadiene compounds are prepared by the reported ways. <sup>1</sup> *t*-BuLi was obtained from Acros Organics. <sup>1</sup>H NMR, and <sup>13</sup>C NMR spectra were recorded on a JEOL-AL300 spectrometer (FT, 300 MHz for <sup>1</sup>H; 75.4 MHz for <sup>13</sup>C) in CDCl<sub>3</sub> at room temperature using Me<sub>4</sub>Si as an internal standard, unless otherwise noted. IR spectra were obtained on a Thermo Nicolet AVATAR 330 FT-IR spectrophotometer. HRMS were recorded on a ZAB-HS instrument.

---

**A typical procedure for syntheses of cyclopentadienones 2a–c and/or their head-to-head dimers 3a–c:** To a 10 mL solution of 1,4-diiodo-1,3-diene compound (1.0 mmol) in Et<sub>2</sub>O at –78 °C was added *t*-BuLi (4.0 mmol, 1.5 mol/L in pentane). After this reaction mixture was stirred at –78 °C for 1 h, CuCl (2.0 mmol) was added and kept at –78 °C for 0.5 h. Then CO was bubbled into the vessel for 5 min, followed by addition of <sup>t</sup>BuOO<sup>t</sup>Bu (2.0 mmol) to this reaction mixture. After 1 h of stirring at 0 °C, the reaction mixture was quenched with water and extracted with Et<sub>2</sub>O. The extraction was washed with brine and dried over MgSO<sub>4</sub>. The solvent was then evaporated in vacuo and the residue was purified by column chromatograph using silica gel (hexane: Et<sub>2</sub>O = 20:1) to afford the final products **2a–c** and **3a–c**.

**2a:** red oil (25 mg, 10%); <sup>1</sup>H NMR (300 MHz, CDCl<sub>3</sub>): δ = 0.88 (t, *J* = 7.2 Hz, 6H, CH<sub>3</sub>), 0.99 (t, *J* = 7.2 Hz, 6H, CH<sub>3</sub>), 1.33–1.54 (m, 8H, CH<sub>2</sub>), 2.04 (t, *J* = 7.5 Hz, 4H, CH<sub>2</sub>), 2.23 (t, *J* = 7.5 Hz, 4H, CH<sub>2</sub>); <sup>13</sup>C NMR (75 MHz, CDCl<sub>3</sub>): δ = 14.23 (2 CH<sub>3</sub>),

14.43 (2 CH<sub>3</sub>), 22.52 (2 CH<sub>2</sub>), 22.85 (2 CH<sub>2</sub>), 24.91 (2 CH<sub>2</sub>), 28.30 (2 CH<sub>2</sub>), 125.78 (2 quat. C), 154.95 (2 quat. C), 204.94 (1 ketone C=O). IR (neat):  $\nu$  (C=O) = 1716 cm<sup>-1</sup>. HRMS (IE): calcd. for C<sub>17</sub>H<sub>28</sub>O: 248.2140, found 248.2145. The NMR data are identical with the literature.<sup>2</sup>

**2b:** red oil (33 mg, 11%); <sup>1</sup>H NMR (300 MHz, CDCl<sub>3</sub>):  $\delta$  = 0.87–1.00 (m, 12H, CH<sub>3</sub>), 1.23–1.44 (m, 16H, CH<sub>2</sub>), 2.05 (t,  $J$  = 7.2 Hz, 4H, CH<sub>2</sub>), 2.24 (t,  $J$  = 7.2 Hz, 4H, CH<sub>2</sub>); <sup>13</sup>C NMR (75 MHz, CDCl<sub>3</sub>):  $\delta$  = 14.03 (2 CH<sub>3</sub>), 14.12 (2 CH<sub>3</sub>), 23.15 (2 CH<sub>2</sub>), 23.21 (2 CH<sub>2</sub>), 23.27 (2 CH<sub>2</sub>), 26.61 (2 CH<sub>2</sub>), 31.64 (2 CH<sub>2</sub>), 32.27 (2 CH<sub>2</sub>), 126.27 (2 quat. C), 154.57 (2 quat. C), 203.89 (1 ketone C=O). IR (neat):  $\nu$  (C=O) = 1714 cm<sup>-1</sup>. HRMS (IE): calcd. for C<sub>21</sub>H<sub>36</sub>O: 304.2766, found 304.2757. The NMR data are identical with the literature.<sup>2</sup>

**2c:** orange oil (23 mg, 12%); <sup>1</sup>H NMR (300 MHz, CDCl<sub>3</sub>):  $\delta$  = 0.99 (t,  $J$  = 7.5 Hz, 6H, CH<sub>3</sub>), 1.11 (t,  $J$  = 7.5 Hz, 6H, CH<sub>3</sub>), 2.10 (q,  $J$  = 7.5 Hz, 4H, CH<sub>2</sub>), 2.29 (q,  $J$  = 7.5 Hz, 4H, CH<sub>2</sub>); <sup>13</sup>C NMR (75 MHz, CDCl<sub>3</sub>):  $\delta$  = 13.79 (2 CH<sub>3</sub>), 14.45 (2 CH<sub>3</sub>), 15.88 (2 CH<sub>2</sub>), 19.07 (2 CH<sub>2</sub>), 126.68 (2 quat. C), 155.85 (2 quat. C), 204.62 (1 ketone C=O). IR (neat):  $\nu$  (C=O) = 1682 cm<sup>-1</sup>. HRMS (IE): calcd. for C<sub>13</sub>H<sub>20</sub>O: 192.1514, found 192.1516.

**3a:** Colorless solid (151 mg, 61%); m. p. 82.1~83.4 °C; <sup>1</sup>H NMR (300 MHz, CDCl<sub>3</sub>):  $\delta$  = 0.74 (t,  $J$  = 7.2 Hz, 6H, CH<sub>3</sub>), 0.82 (t,  $J$  = 7.2 Hz, 6H, CH<sub>3</sub>), 0.97 (t,  $J$  = 7.2 Hz, 6H, CH<sub>3</sub>), 1.09 (t,  $J$  = 7.2 Hz, 6H, CH<sub>3</sub>), 1.36–1.73 (m, 24H, CH<sub>2</sub>), 2.18–2.41 (m, 8H, CH<sub>2</sub>); <sup>13</sup>C NMR (75 MHz, CDCl<sub>3</sub>):  $\delta$  = 14.70 (2 CH<sub>3</sub>), 15.05 (2 CH<sub>3</sub>), 15.40 (2 CH<sub>3</sub>), 15.66 (2 CH<sub>3</sub>), 17.56 (2 CH<sub>2</sub>), 19.22 (2 CH<sub>2</sub>), 21.49 (2 CH<sub>2</sub>), 21.72 (2 CH<sub>2</sub>), 26.56 (2 CH<sub>2</sub>), 32.49 (2 CH<sub>2</sub>), 32.92 (2 CH<sub>2</sub>), 33.30 (2 CH<sub>2</sub>), 53.83 (2 quat. C), 60.85 (2 quat. C), 144.84 (2 quat. C), 173.41 (2 quat. C), 209.36 (2 ketone C=O). IR (neat):  $\nu$  (C=O) = 1692 cm<sup>-1</sup>. HRMS (EI): calcd. for C<sub>34</sub>H<sub>56</sub>O<sub>2</sub>: 496.4280, found 496.4277.

**3b:** Colorless solid (128 mg, 42%); m. p. 65.6~67.0 °C; <sup>1</sup>H NMR (300 MHz, CDCl<sub>3</sub>):

$\delta = 0.82$  (t,  $J = 7.2$  Hz, 6H, CH<sub>3</sub>), 0.83 (t,  $J = 7.2$  Hz, 6H, CH<sub>3</sub>), 0.94 (t,  $J = 6.9$  Hz, 6H, CH<sub>3</sub>), 1.00 (t,  $J = 7.2$  Hz, 6H, CH<sub>3</sub>), 1.11–1.64 (m, 40H, CH<sub>2</sub>), 2.20–2.38 (m, 8H, CH<sub>2</sub>); <sup>13</sup>C NMR (75 MHz, CDCl<sub>3</sub>):  $\delta = 13.85$  (2 CH<sub>3</sub>), 13.87 (2 CH<sub>3</sub>), 13.91 (4 CH<sub>3</sub>), 23.29 (2 CH<sub>2</sub>), 23.83 (2 CH<sub>2</sub>), 24.16 (6 CH<sub>2</sub>), 26.30 (2 CH<sub>2</sub>), 28.01 (2 CH<sub>2</sub>), 29.95 (2 CH<sub>2</sub>), 30.21 (2 CH<sub>2</sub>), 30.31 (2 CH<sub>2</sub>), 30.46 (2 CH<sub>2</sub>), 30.73 (2 CH<sub>2</sub>), 53.73 (2 quat. C), 60.77 (2 quat. C), 144.90 (2 quat. C), 173.44 (2 quat. C), 209.27 (2 ketone C=O). IR (neat):  $\nu$  (C=O) = 1694 cm<sup>-1</sup>. HRMS (EI): calcd. for C<sub>42</sub>H<sub>72</sub>O<sub>2</sub>: 608.5532, found 608.5525.

**3c:** Colorless solid (92 mg, 48%); m. p. 92.3~93.5 °C; <sup>1</sup>H NMR (300 MHz, CDCl<sub>3</sub>):  $\delta = 0.62$  (t,  $J = 7.2$  Hz, 6H, CH<sub>3</sub>), 1.08 (t,  $J = 7.5$  Hz, 6H, CH<sub>3</sub>), 1.11 (t,  $J = 7.5$  Hz, 6H, CH<sub>3</sub>), 1.28 (t,  $J = 7.5$  Hz, 6H, CH<sub>3</sub>), 1.43–1.85 (m, 8H, CH<sub>2</sub>), 2.26–2.54 (m, 8H, CH<sub>2</sub>); <sup>13</sup>C NMR (75 MHz, CDCl<sub>3</sub>):  $\delta = 9.36$  (2 CH<sub>3</sub>), 10.92 (2 CH<sub>3</sub>), 12.74 (4 CH<sub>3</sub>), 17.31 (2 CH<sub>2</sub>), 21.91 (2 CH<sub>2</sub>), 23.13 (2 CH<sub>2</sub>), 23.32 (2 CH<sub>2</sub>), 53.80 (2 quat. C), 61.19 (2 quat. C), 146.33 (2 quat. C), 173.90 (2 quat. C), 209.45 (2 ketone C=O). IR (neat):  $\nu$  (C=O) = 1681 cm<sup>-1</sup>. HRMS (EI): calcd. for C<sub>26</sub>H<sub>40</sub>O<sub>2</sub>: 384.3028, found 384.3019.

**3d:** Obtained as colorless solid (135 mg, 55%) in a manner analogous to that described for the synthesis of **3a**. It was noted that only trace amount of cyclopentadienone was observed in this process. M. p. 117.1~118.5 °C; <sup>1</sup>H NMR (300 MHz, CDCl<sub>3</sub>):  $\delta = 0.77$  (t,  $J = 7.2$  Hz, 6H, CH<sub>3</sub>), 0.91 (t,  $J = 7.2$  Hz, 6H, CH<sub>3</sub>), 1.12–1.37 (m, 20H, CH<sub>2</sub>), 1.71–1.92 (m, 8H, CH<sub>2</sub>), 2.08–2.91 (m, 12H, CH<sub>2</sub>); <sup>13</sup>C NMR (75 MHz, CDCl<sub>3</sub>):  $\delta = 13.87$  (2 CH<sub>3</sub>), 13.90 (2 CH<sub>3</sub>), 22.70 (2 CH<sub>2</sub>), 22.77 (2 CH<sub>2</sub>), 23.53 (2 CH<sub>2</sub>), 24.09 (2 CH<sub>2</sub>), 26.65 (2 CH<sub>2</sub>), 27.62 (2 CH<sub>2</sub>), 27.99 (2 CH<sub>2</sub>), 28.35 (2 CH<sub>2</sub>), 29.13 (2 CH<sub>2</sub>), 31.11 (2 CH<sub>2</sub>), 54.49 (2 quat. C), 54.57 (2 quat. C), 141.90 (2 quat. C), 174.79 (2 quat. C), 208.19 (2 ketone C=O). IR (neat):  $\nu$  (C=O) = 1692 cm<sup>-1</sup>. HRMS (IE): calcd. for C<sub>34</sub>H<sub>52</sub>O<sub>2</sub>: 492.3967, found 492.3968.

**A typical procedure for syntheses of cyclopentadienones 2d–h:** To a 10 mL solution of 1,4-diiodo-1,3-diene compound (1.0 mmol) in Et<sub>2</sub>O at –78 °C was added

*t*-BuLi (4.0 mmol, 1.5 mol/L in pentane). After this reaction mixture was stirred at  $-78\text{ }^{\circ}\text{C}$  for 1 h, CuCl (2.0 mmol) was added and kept at  $-78\text{ }^{\circ}\text{C}$  for 0.5 h. Then CO was bubbled into the vessel for 5 min, followed by addition of *t*-BuOO*t*-Bu (2.0 mmol) to this reaction mixture. After 1 h of stirring at  $0\text{ }^{\circ}\text{C}$ , the reaction mixture was quenched with water and extracted with Et<sub>2</sub>O. The extraction was washed with brine and dried over MgSO<sub>4</sub>. The solvent was then evaporated in vacuo and the residue was purified by column chromatograph using silica gel (hexane: Et<sub>2</sub>O = 20:1) to afford exclusively the final products **2d–h**.

**2d**: red solid (269 mg, 70%); <sup>1</sup>H NMR (300 MHz, CDCl<sub>3</sub>):  $\delta$  = 6.90–6.94 (m, 4H, CH), 7.15–7.19 (m, 4H, CH), 7.23–7.26 (m, 12H, CH); <sup>13</sup>C NMR (75 MHz, CDCl<sub>3</sub>):  $\delta$  = 125.30 (2 quat. C), 127.45 (2 CH), 127.98 (4 CH), 128.03 (4 CH), 128.50 (2 CH), 129.33 (4 CH), 130.14 (4 CH), 130.73 (2 quat. C), 133.05 (2 quat. C), 154.47 (2 quat. C), 200.24 (1 ketone C=O). IR (neat):  $\nu$  (C=O) = 1702 cm<sup>-1</sup>. HRMS (IE): calcd. for C<sub>29</sub>H<sub>20</sub>O: 384.1514, found 384.1522. The NMR data are identical with the literature.<sup>3</sup>

**2e**: orange oil (236 mg, 70%); <sup>1</sup>H NMR (300 MHz, CDCl<sub>3</sub>):  $\delta$  = 0.40 (s, 18H, TMS), 0.92 (t, *J* = 6.6 Hz, 6H, CH<sub>3</sub>), 1.33–1.48 (m, 8H, CH<sub>2</sub>), 2.40 (t, *J* = 7.2 Hz, 4H, CH<sub>2</sub>); <sup>13</sup>C NMR (75 MHz, CDCl<sub>3</sub>):  $\delta$  = 0.06 (6 CH<sub>3</sub>) 13.86 (2 CH<sub>3</sub>), 23.18 (2 CH<sub>2</sub>), 28.05 (2 CH<sub>2</sub>), 32.87 (2 CH<sub>2</sub>), 128.21 (2 quat. C), 172.85 (2 quat. C), 211.12 (1 ketone C=O). IR (neat):  $\nu$  (C=O) = 1700 cm<sup>-1</sup>. HRMS (IE): calcd. for C<sub>19</sub>H<sub>36</sub>OSi<sub>2</sub>: 336.2305, found 336.2317. The NMR data are identical with the literature.<sup>2</sup>

**2f**: red oil (145 mg, 50%); <sup>1</sup>H NMR (300 MHz, CDCl<sub>3</sub>):  $\delta$  = 0.83 (t, *J* = 7.5 Hz, 3H, CH<sub>3</sub>), 1.10 (t, *J* = 7.5 Hz, 3H, CH<sub>3</sub>), 2.24–2.39 (m, 4H, CH<sub>2</sub>), 7.15–7.39 (m, 10H, CH); <sup>13</sup>C NMR (75 MHz, CDCl<sub>3</sub>):  $\delta$  = 13.09 (1 CH<sub>3</sub>), 14.45 (1 CH<sub>3</sub>), 16.22 (1 CH<sub>2</sub>), 19.59 (1 CH<sub>2</sub>), 124.79 (1 quat. C), 126.95 (1 CH), 127.35 (1 quat. C), 127.86 (2 CH), 128.17 (2 CH), 128.22 (2 CH), 128.63 (2 CH), 129.65 (1 CH), 131.00 (1 quat. C), 134.52 (1 quat. C), 154.05 (1 quat. C), 157.48 (1 quat. C), 202.56 (1 ketone C=O). IR (neat):  $\nu$  (C=O) = 1711 cm<sup>-1</sup>. HRMS (IE): calcd. for C<sub>21</sub>H<sub>20</sub>O: 288.1514, found

288.1512.

**2g:** red oil (234 mg, 68%);  $^1\text{H}$  NMR (300 MHz,  $\text{CDCl}_3$ ):  $\delta$  = 0.57 (t,  $J$  = 6.9 Hz, 3H,  $\text{CH}_3$ ), 0.75 (t,  $J$  = 6.9 Hz, 3H,  $\text{CH}_3$ ), 0.80–1.53 (m, 8H,  $\text{CH}_2$ ), 2.12 (t,  $J$  = 6.9 Hz, 2H,  $\text{CH}_2$ ), 2.42 (t,  $J$  = 6.9 Hz, 2H,  $\text{CH}_2$ ), 7.22–7.43 (m, 10H, CH);  $^{13}\text{C}$  NMR (75 MHz,  $\text{CDCl}_3$ ):  $\delta$  = 13.39 (1  $\text{CH}_3$ ), 13.75 (1  $\text{CH}_3$ ), 22.41 (1  $\text{CH}_2$ ), 22.66 (1  $\text{CH}_2$ ), 22.84 (1  $\text{CH}_2$ ), 26.69 (1  $\text{CH}_2$ ), 29.90 (1  $\text{CH}_2$ ), 31.62 (1  $\text{CH}_2$ ), 125.00 (1 quat. C), 127.05 (1 CH), 127.85 (2 CH), 128.07 (1 CH), 128.17 (2 CH), 128.35 (2 CH), 129.30 (2 CH), 131.72 (1 quat. C), 134.17 (1 quat. C), 153.47 (1 quat. C), 158.28 (2 quat. C), 202.53 (1 ketone C=O). IR (neat):  $\nu$  (C=O) = 1690  $\text{cm}^{-1}$ . HRMS (IE): calcd. for  $\text{C}_{25}\text{H}_{28}\text{O}$ : 344.2140, found 344.2145. The NMR data are identical with the literature.<sup>2</sup>

**2h:** green oil (109 mg, 45%);  $^1\text{H}$  NMR (300 MHz,  $\text{CDCl}_3$ ):  $\delta$  = 0.85 (t,  $J$  = 7.2 Hz, 3H,  $\text{CH}_3$ ), 0.90 (t,  $J$  = 7.2 Hz, 3H,  $\text{CH}_3$ ), 1.23–1.55 (m, 8H,  $\text{CH}_2$ ), 2.17 (t,  $J$  = 7.5 Hz, 2H,  $\text{CH}_2$ ), 2.45 (t,  $J$  = 7.5 Hz, 2H,  $\text{CH}_2$ ), 6.93–7.29 (m, 4H, CH);  $^{13}\text{C}$  NMR (75 MHz,  $\text{CDCl}_3$ ):  $\delta$  = 13.88 (2  $\text{CH}_3$ ), 22.58 (1  $\text{CH}_2$ ), 22.75 (1  $\text{CH}_2$ ), 22.99 (1  $\text{CH}_2$ ), 25.97 (1  $\text{CH}_2$ ), 29.94 (1  $\text{CH}_2$ ), 31.42 (1  $\text{CH}_2$ ), 118.90 (1 CH), 121.59 (1 CH), 127.79 (1 CH), 131.11 (1 quat. C), 133.08 (1 CH), 134.75 (1 quat. C), 145.64 (1 quat. C), 157.71 (1 quat. C), 198.50 (1 ketone C=O). IR (neat):  $\nu$  (C=O) = 1718  $\text{cm}^{-1}$ . HRMS (IE): calcd. for  $\text{C}_{17}\text{H}_{22}\text{O}$ : 242.1671, found 242.1679. The NMR data are identical with the literature.<sup>2</sup>

### References:

- 1) Representative methods for the preparation of 1,4-dihalo-1,3-diene derivatives, see: (a) E. Negishi, F. E. Cederbaum and T. Takahashi, *Tetrahedron Lett.*, 1986, **27**, 2829–2832; (b) S. L. Buchwald and R. B. Nielsen, *J. Am. Chem. Soc.*, 1989, **111**, 2870–2874; (c) C. Xi, S. Huo, T. H. Afifi, R. Hara and T. Takahashi, *Tetrahedron Lett.*, 1997, **38**, 4099–4102; (d) S. Yamaguchi, R. Jin, K. Tamao, and F. Sato, *J. Org. Chem.*, 1998, **63**, 10060–10062; (e) Z. Xi, Z. Song, G. Liu, X. Liu and T. Takahashi, *J. Org. Chem.*, 2006, **71**, 3154–3158.

- 2) Z. Xi and Q. Song, *J. Org. Chem.*, 2000, **65**, 9157–9159.
- 3) P. A. Wender, T. J. Paxton and T. J. Williams, *J. Am. Chem. Soc.*, 2006, **128**, 14814–14815.

**2. Copies of  $^1\text{H}$  NMR and  $^{13}\text{C}$  NMR spectra for all new compounds.**



D:\LUO QIAN\1-121\H.als  
Fri Jan 12 21:51:41 2007

1H  
NON  
300.40 MHz  
130.00 KHZ  
1150.0 Hz  
32768  
6013.2 Hz  
16  
5.449 sec  
1.551 sec  
5.8 us  
1H  
24.1 C  
CDCL3  
0.00 ppm  
0.09 Hz  
13

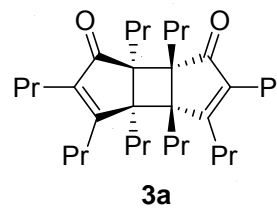

DFILE  
COMNT  
DATIM  
OBNUC  
EXMOD  
OBFRQ  
OBSET  
OBFIN  
POINT  
FREQU  
SCANS  
ACQTM  
PD  
PWL  
IRNUC  
CTEMP  
SLVNT  
EXREF  
BF  
RGAIN

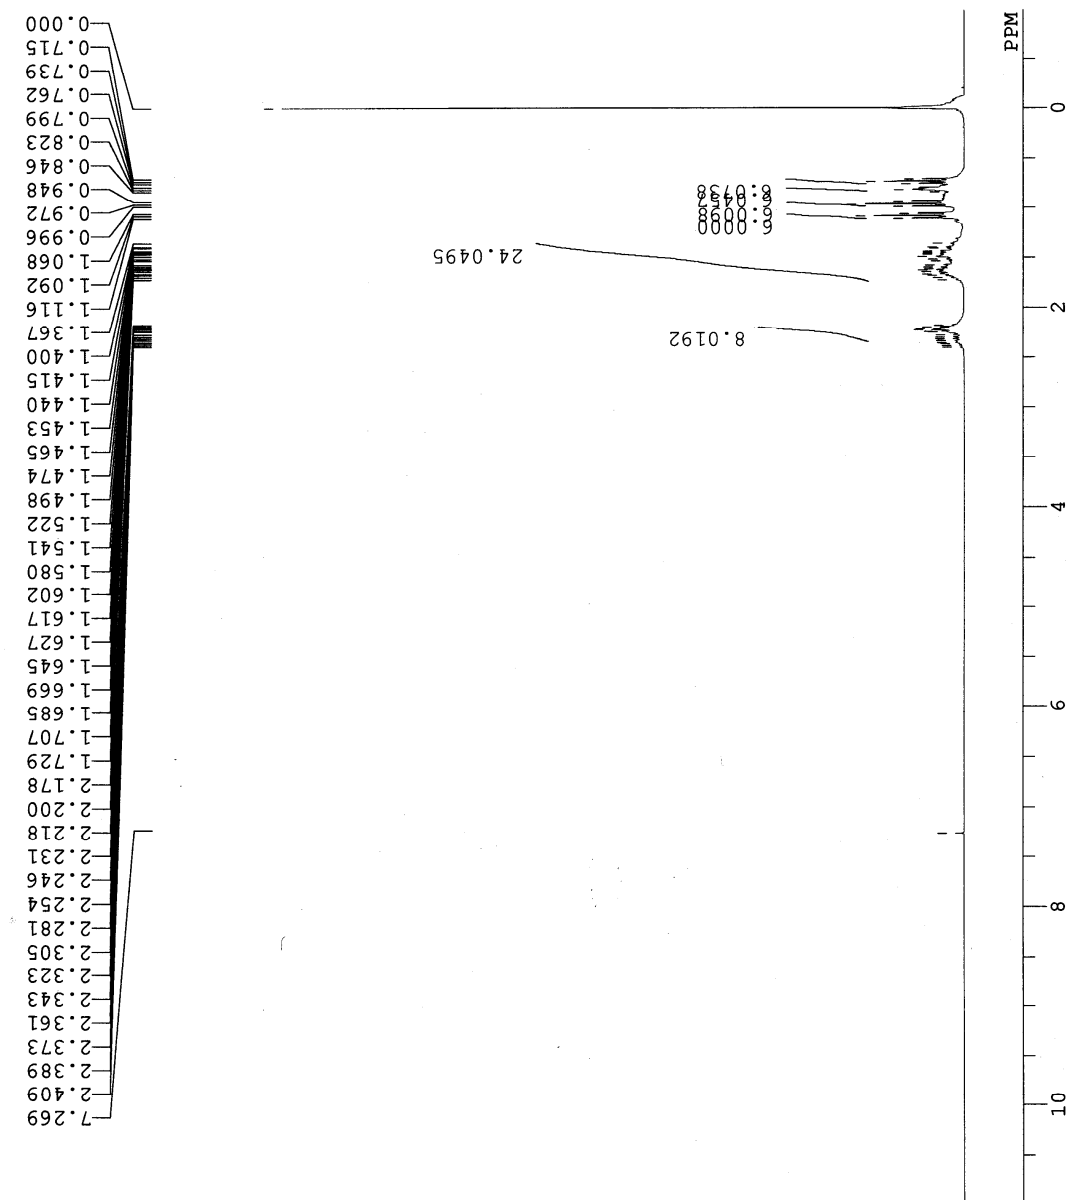

D:\LUO QIAN\1-121\C-824.als

DFILE  
COMNT  
DATM  
OBNUC  
EXMOD  
OBFRQ  
OBSET  
OBFIN  
POINT  
FREQU  
SCANS  
ACQTM  
PD  
PW1  
IRNUC  
CTEMP  
SLVNT  
EXREF  
BF  
RGAIN

Fri Jan 12 21:48:23 2007

13C

BCM

75.45 MHz  
124.00 KHz  
1840.0 Hz  
32768  
20408.1 Hz  
824  
1.606 sec  
1.394 sec  
5.0 us  
24.7 C  
0.00 ppm  
0.62 Hz  
26

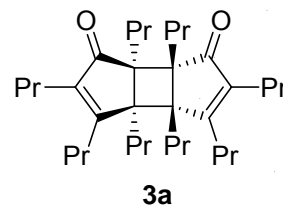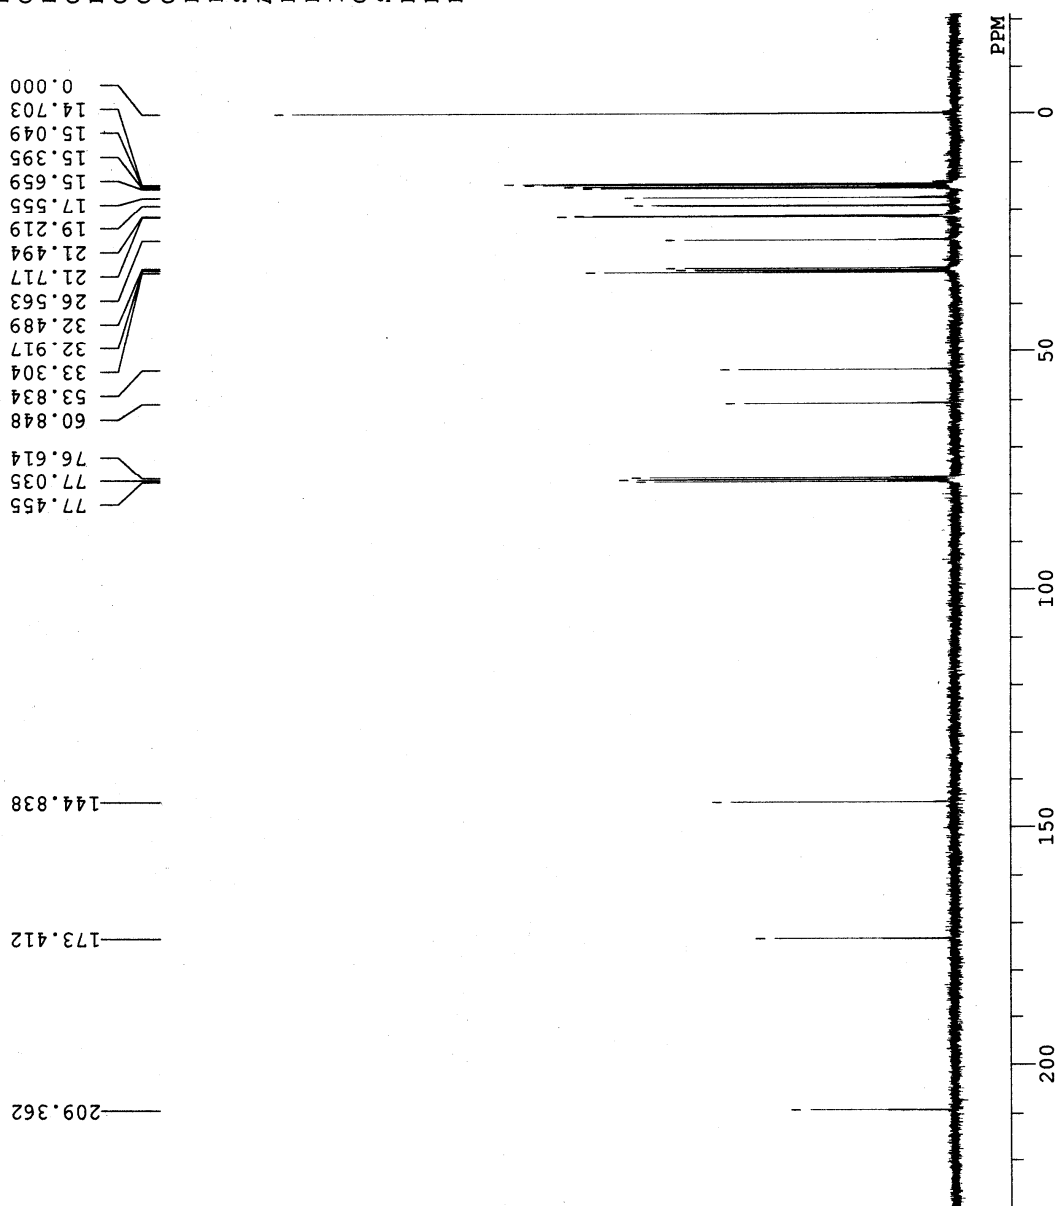

D:\LUO QIAN\1-117\SUB2-H.a.

Wed Jan 10 11:08:46 2007

DFILE COMNT  
 DATIM  
 OBNUC 1H  
 EXMOD NON  
 OBFREQ 300.40 MHz  
 OBSSET 130.00 KHz  
 OBFIN 1150.0 Hz  
 POINT 32768  
 FREQU 6013.2 Hz  
 SCANS 16  
 ACQTM 5.449 sec  
 PD 1.551 sec  
 PWL 5.8 us  
 IRNUC 1H  
 CTEMP 23.0 c  
 SLVNT CDCL3  
 EXREF 0.00 ppm  
 BF 0.09 Hz  
 RGAIN 11

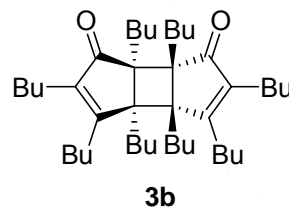

0.000  
 0.796  
 0.802  
 0.821  
 0.827  
 0.844  
 0.851  
 0.914  
 0.938  
 0.960  
 0.976  
 1.001  
 1.025  
 1.113  
 1.137  
 1.175  
 1.197  
 1.222  
 1.247  
 1.351  
 1.403  
 1.414  
 1.437  
 1.462  
 1.486  
 1.511  
 1.553  
 1.625  
 1.643  
 2.201  
 2.221  
 2.233  
 2.248  
 2.268  
 2.282  
 2.303  
 2.324  
 2.340  
 2.359  
 2.374  
 7.276

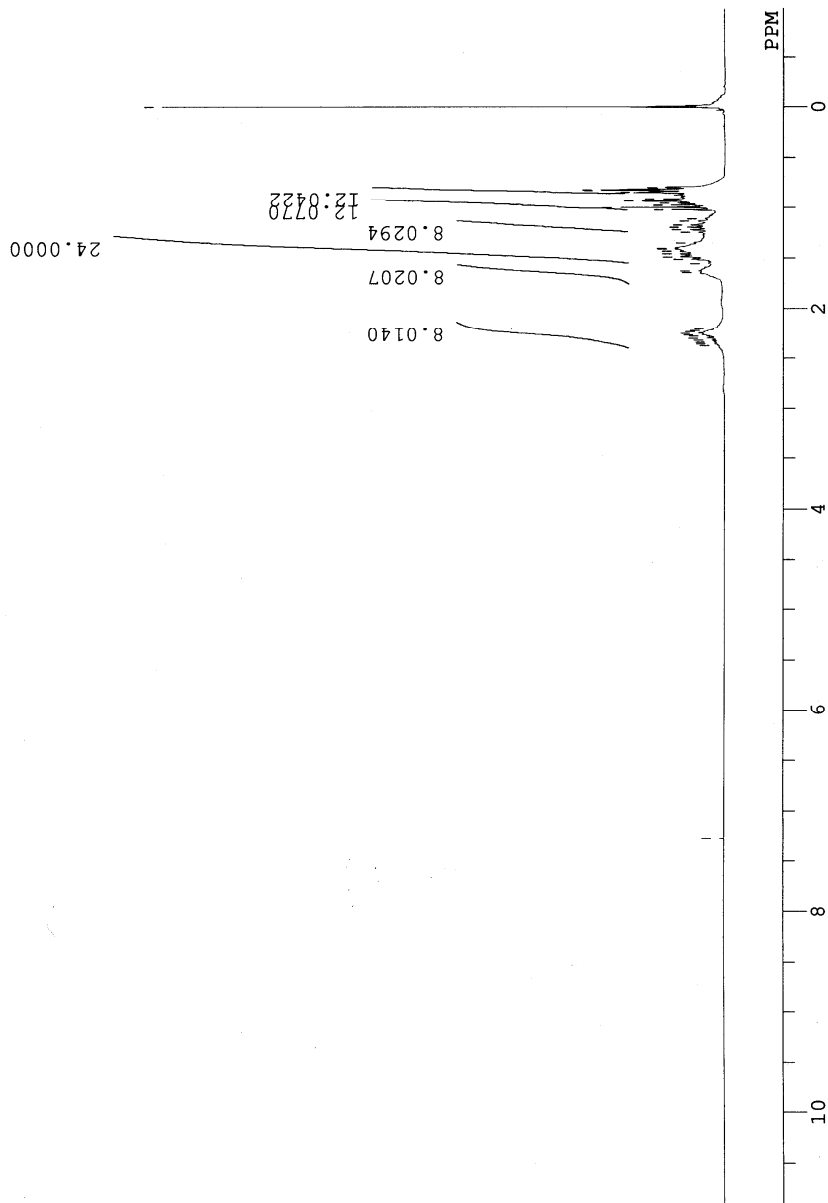

D:\LJO QIAN\1-117\SUB2-C.a1  
COMNT  
DATIM Wed Jan 10 10:32:03 2007  
OBNUC 13C  
EXMOD BCM  
OBFRQ 75.45 MHZ  
OBSET 124.00 KHZ  
OBFIN 1840.0 HZ  
POINT 32768  
FREQU 20408.1 HZ  
SCANS 632  
ACQTM 1.606 sec  
PD 1.394 sec  
PW1 5.0 us  
IRNUC 1H  
CTEMP 23.8 c  
SLVNT CDCL3  
EXREF 0.00 ppm  
BF 0.62 HZ  
RGAIN 26

0.000  
13.854  
13.871  
13.912  
23.291  
23.827  
24.164  
26.299  
28.013  
29.950  
30.206  
30.313  
30.461  
30.725  
53.727  
60.774  
76.631  
77.059  
77.480

144.896

173.445

209.272

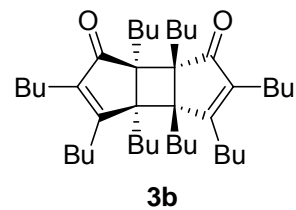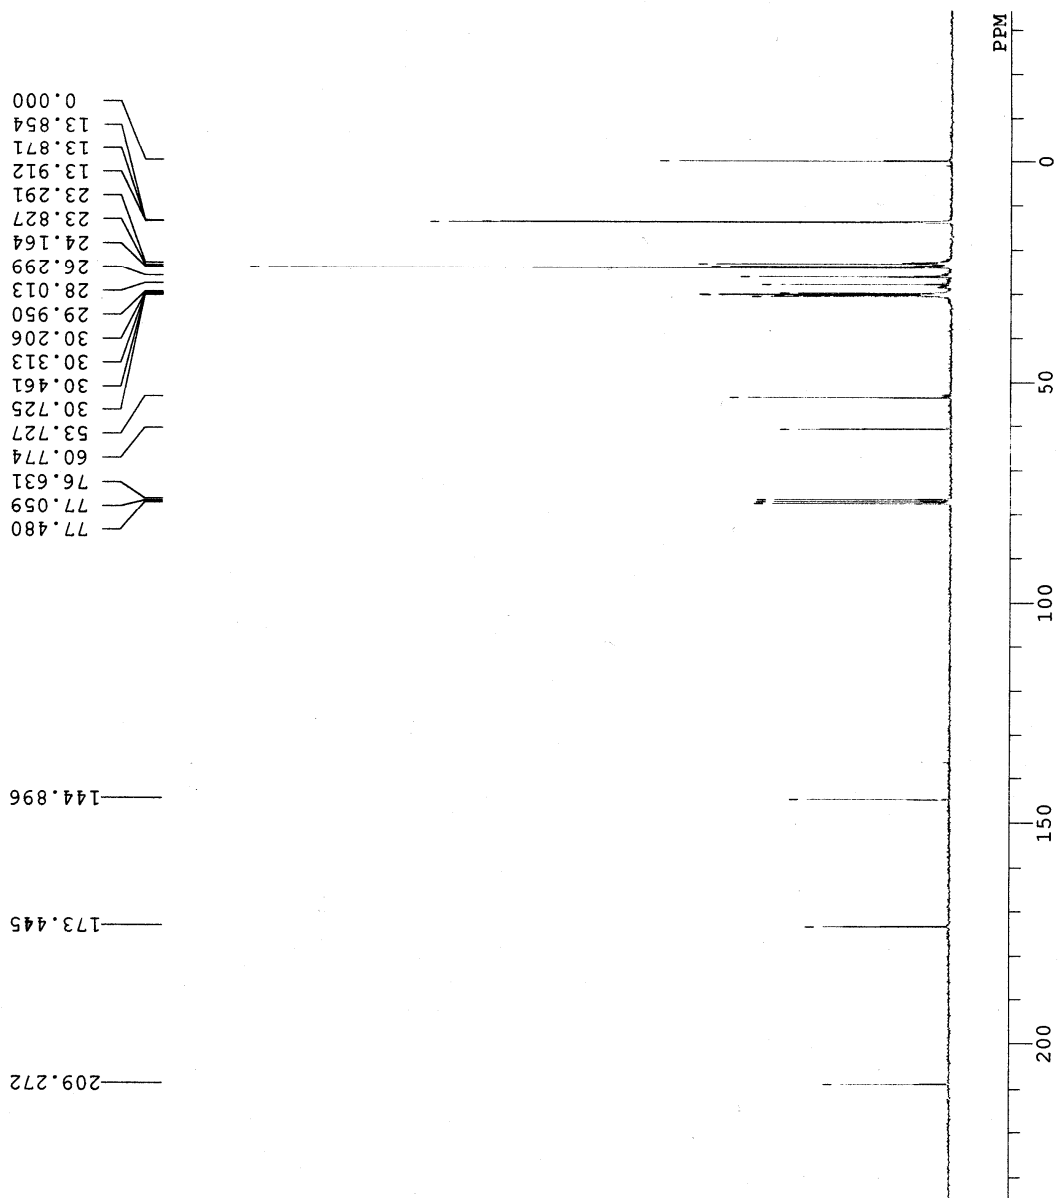

D:\LUO QIAN\2-1\SUB2-h-high

DFILE  
 COMNT  
 DATIM Wed Jan 31 14:29:46 2007  
 IH  
 OBNUC NON  
 EXMOD  
 OBFREQ 300.40 MHz  
 OBSET 130.00 KHz  
 OBFIN 1150.0 Hz  
 POINT 32768  
 FREQU 6013.2 Hz  
 SCANS 64  
 ACQTM 5.449 sec  
 PD 1.551 sec  
 PW1 5.8 us  
 IRNUC 1H  
 CTEMP 23.8 c  
 SLVNT CDCL3  
 EXREF 0.00 ppm  
 BF 0.09 Hz  
 RGAIN 16

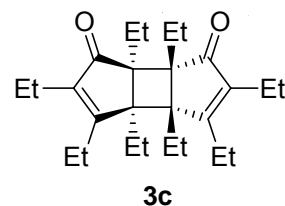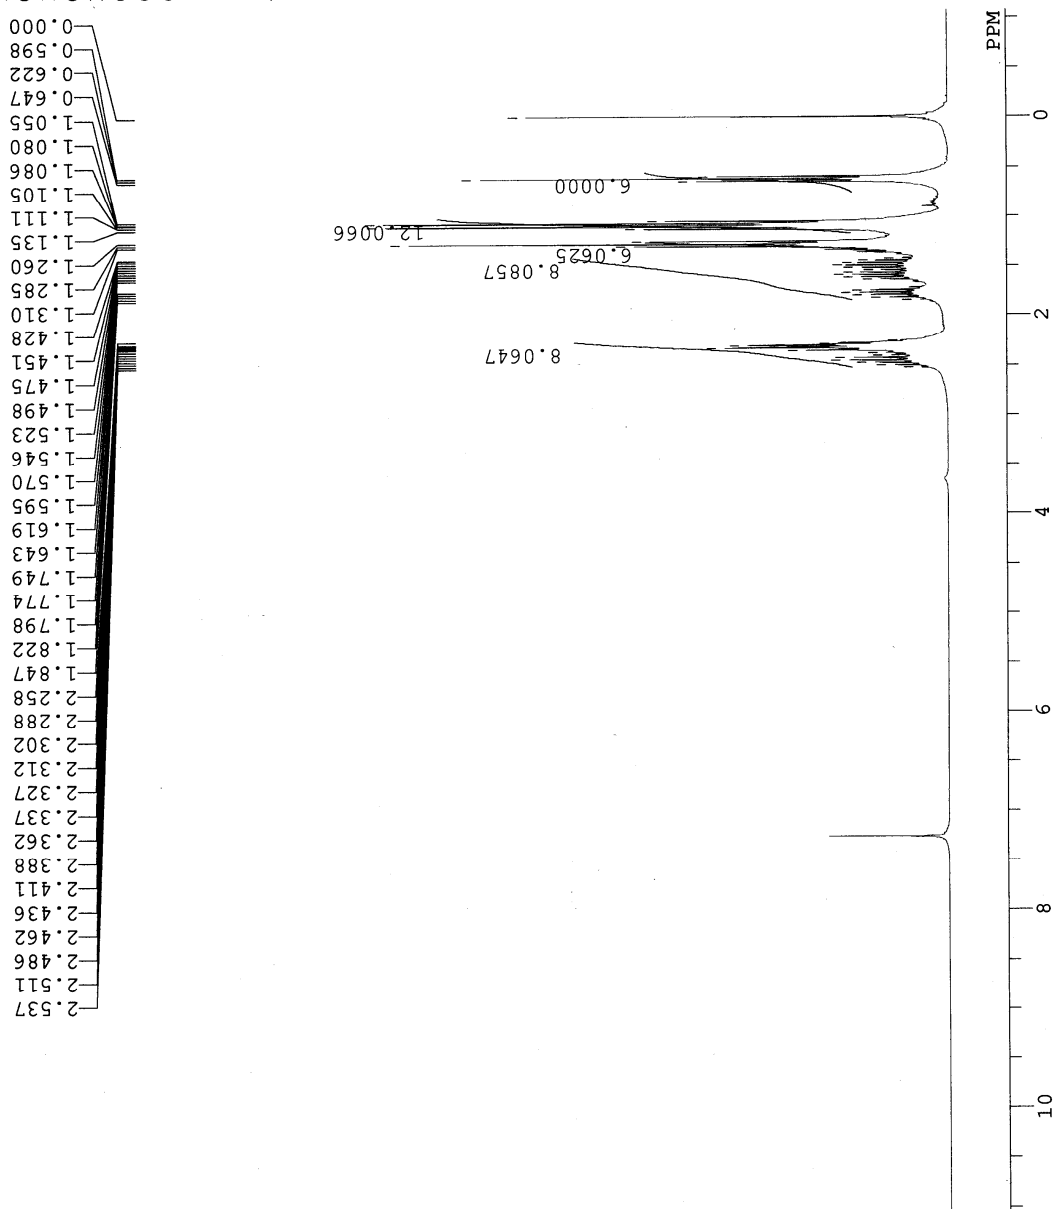

D:\LUO QIAN\2-1\SUB2-C-high  
Wed Jan 31 13:40:22 2007

DFILE  
COMNT  
DATIM  
OBNUC  
EXMOD  
OBFRQ  
OBSET  
OBFIN  
POINT  
FREQU  
SCANS  
ACQTM  
PD  
PWL  
IRNUC  
CTEMP  
SIVNT  
EXREF  
BF  
RGAIN

0.000  
9.362  
10.920  
12.742  
17.307  
21.906  
23.134  
23.332

53.801  
61.194

76.598  
77.026  
77.447

146.330

173.898

209.445

75.45 MHz  
124.00 KHZ  
1840.0 Hz  
32768  
20408.1 Hz  
1306  
1.606 sec  
1.394 sec  
5.0 us  
1H  
24.3 c  
CDCL3  
0.00 ppm  
0.62 Hz  
26

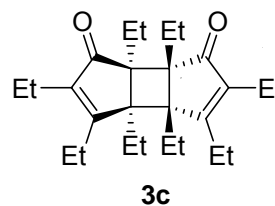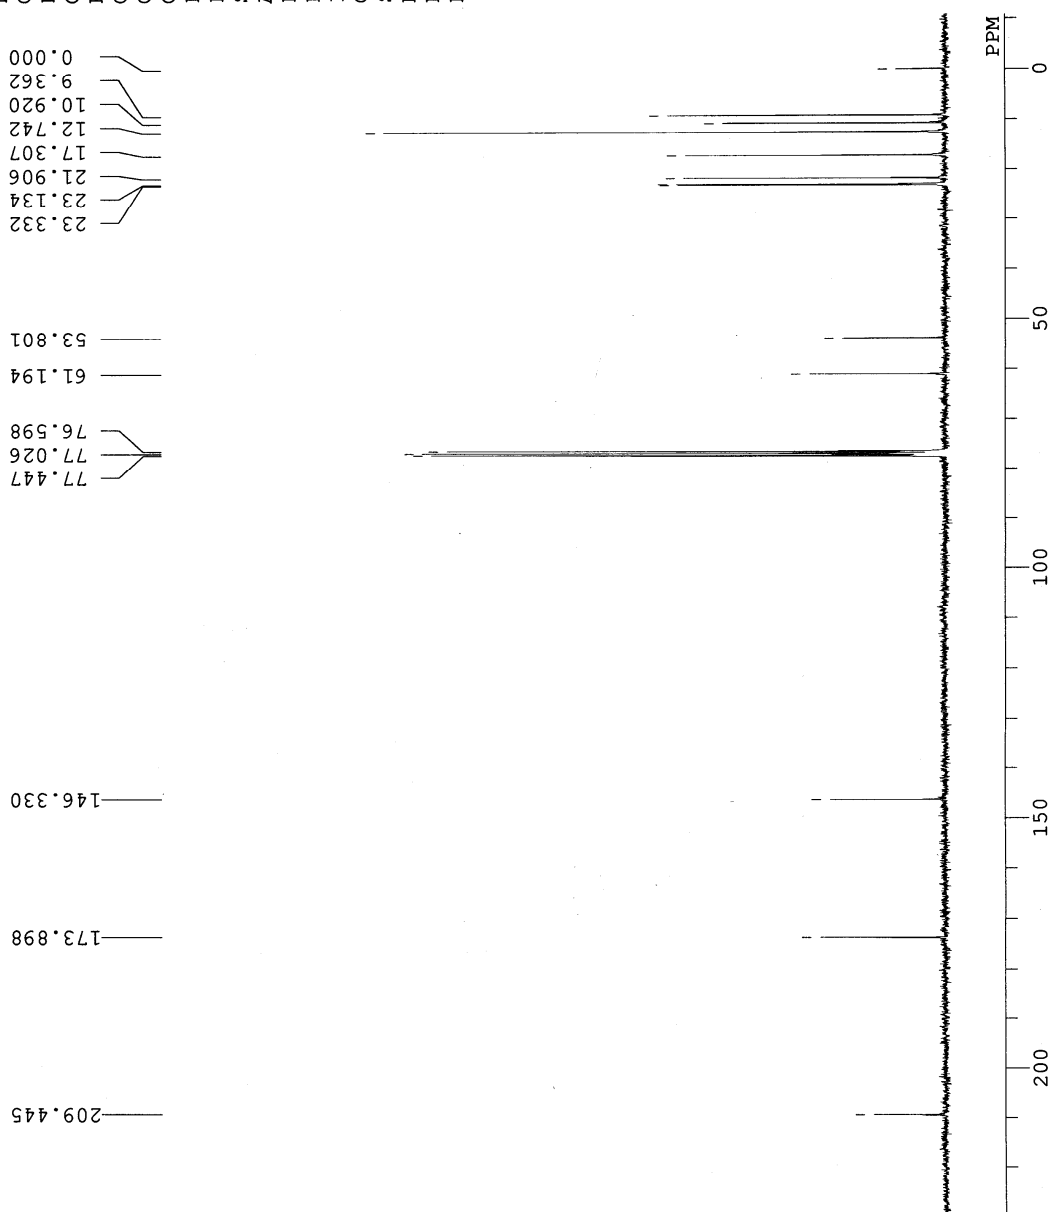

D:\LUO QIAN\2-22\SUB3-H-16

Thu Mar 29 20:27:05 2007

1H  
NON  
300.40 MHz  
130.00 KHz  
1150.0 Hz  
32768  
6013.2 Hz  
16  
5.449 sec  
1.551 sec  
5.8 us  
1H  
28.2 c  
CDCL3  
0.00 ppm  
0.09 Hz  
8

DFIE  
COMNT  
DATIM  
OBNUC  
EXMOD  
OBFRQ  
OBSET  
OBFIN  
POINT  
FREQU  
SCANS  
ACQTM  
PD  
PWL  
IRNUC  
CTEMP  
SLVNT  
EXREF  
BF  
RGAIN

0.00  
0.749  
0.772  
0.795  
0.890  
0.913  
0.936  
1.120  
1.144  
1.155  
1.167  
1.200  
1.296  
1.340  
1.368  
1.705  
1.754  
1.834  
1.875  
1.920  
2.083  
2.129  
2.235  
2.251  
2.274  
2.290  
2.317  
2.336  
2.363  
2.864  
2.911

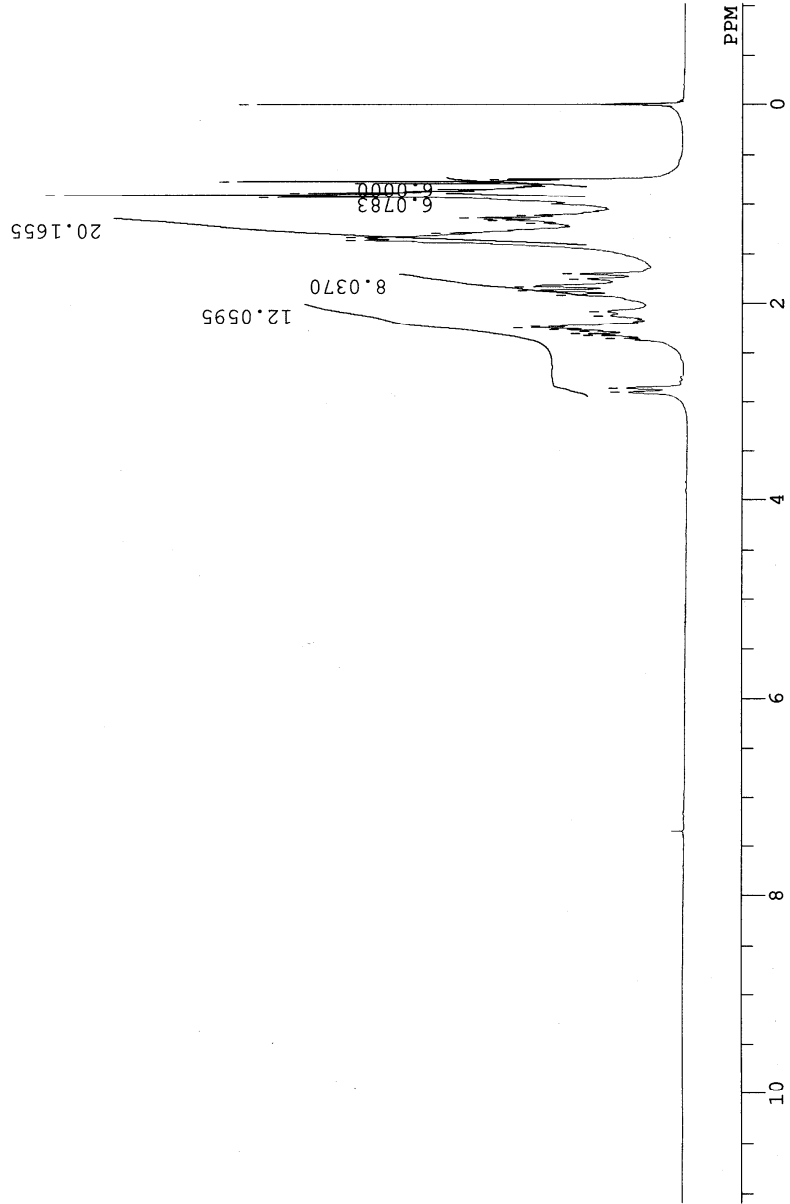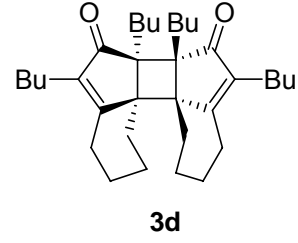

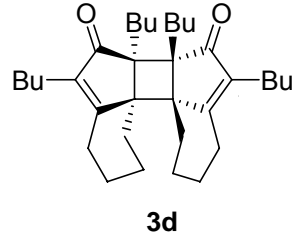

D:\LUC QIAN\2-17\SUB3-C-1;  
COMNT  
DATIM Tue Mar 20 14:12:51 2007  
OBNUC 13C  
EXMOD BCM

OBFRQ 75.45 MHz  
OBSET 124.00 KHz  
OBFIN 1840.0 Hz  
POINT 32768  
FREQU 20408.1 Hz  
SCANS 1280  
ACQTM 1.606 sec  
PD 1.394 sec  
PWL 5.0 us  
IRNUC 1H  
CTEMP 25.0 c  
SLVNT CDCL3  
EXREF 0.00 ppm  
BF 0.62 Hz  
RGAIN 26

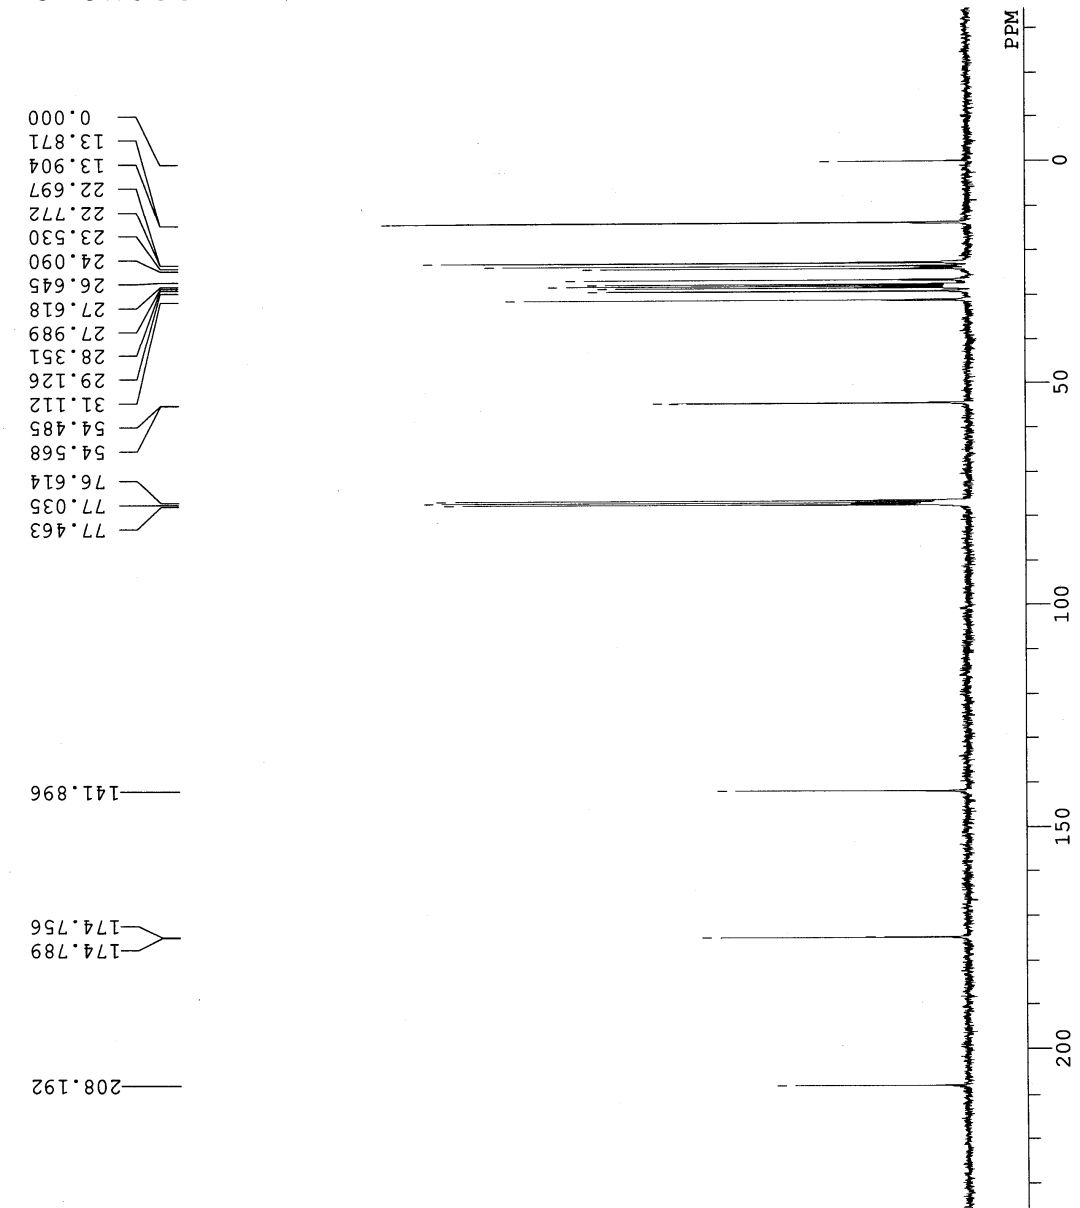



D:\LUO QIAN\2-87\H-64.als

DFILE  
COMNT  
DATIM  
OBNUC  
EXMOD  
OBFRQ  
OBSET  
OBFIN  
POINT  
FREQU  
SCANS  
ACQTM  
PD  
PWL  
IRNUC  
CTEMP  
SLVNT  
EXREF  
BF  
RGAIN

Thu Aug 02 18:12:30 2007  
1H  
NON

300.40 MHz  
130.00 KHz  
1150.0 Hz  
32768  
6013.2 Hz  
64  
5.449 sec  
1.551 sec  
5.8 us  
1H  
22.9 c  
CDCl3  
0.00 ppm  
0.09 Hz  
17

2.328  
2.303  
2.278  
2.253  
2.140  
2.115  
2.090  
2.064  
1.131  
1.106  
1.081  
1.015  
0.990  
0.966  
0.000

6.0000  
6.0188

3.9673  
4.0063

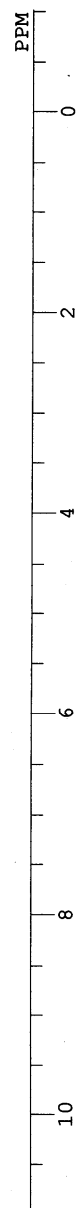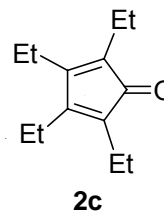

D:\LUO QIAN\2-87\c-overnig

DFILE  
COMNT  
DATIM  
OBNUC  
EXMOD  
OBFRQ  
OBSET  
OBFIN  
POINT  
FREQU  
SCANS  
ACQTM  
PD  
PWL  
IRNUC  
CTEMP  
SLVNT  
EXREF  
BF  
RGAIN

2-87\c-overnig  
Fri Aug 03 09:00:50 2007  
13C  
BCM

75.45 MHz  
124.00 KHz  
1840.0 Hz  
32768  
20408.1 Hz  
13804  
1.606 sec  
1.394 sec  
5.0 us  
23.5 c  
CDCL3  
0.00 ppm  
0.62 Hz  
26

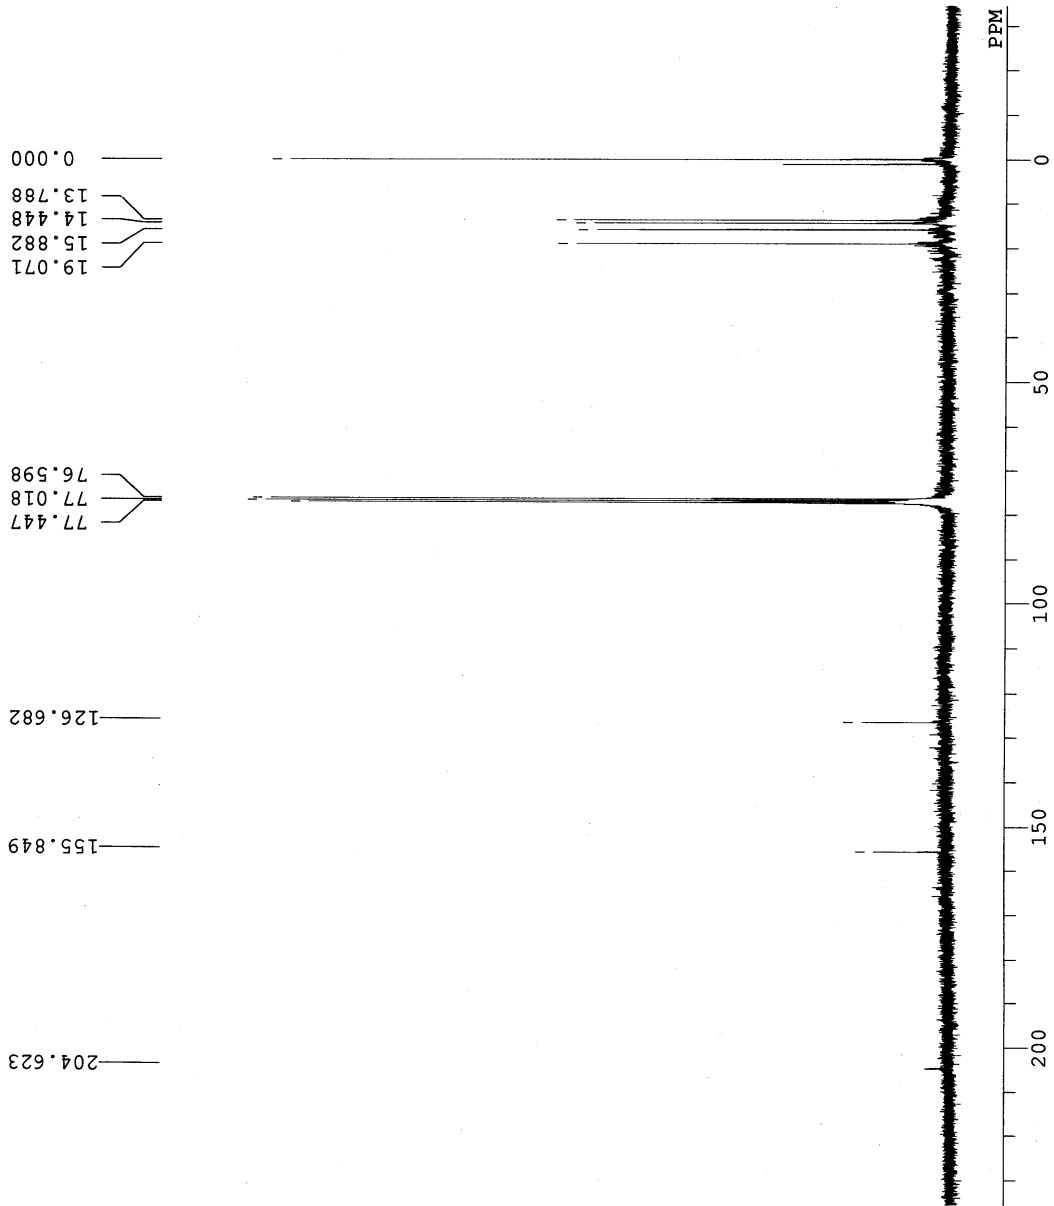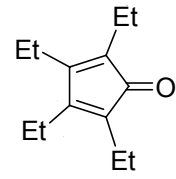

2c

D:\LUO QIAN\2-19\SUB2-H-16.  
COMNT  
DATIM Wed Mar 21 00:28:57 2007  
OBNUC 1H  
EXMOD NON  
OBFRQ 300.40 MHz  
OBSET 130.00 KHz  
OBFIN 1150.0 Hz  
POINT 32768  
FREQU 6013.2 Hz  
SCANS 16  
ACQTM 5.449 sec  
PD 1.551 sec  
PW1 5.8 us  
IRNUC 1H  
CTEMP 24.6 c  
SLVNT CDCL3  
EXREF 0.00 ppm  
BF 0.09 Hz  
RGAIN 18

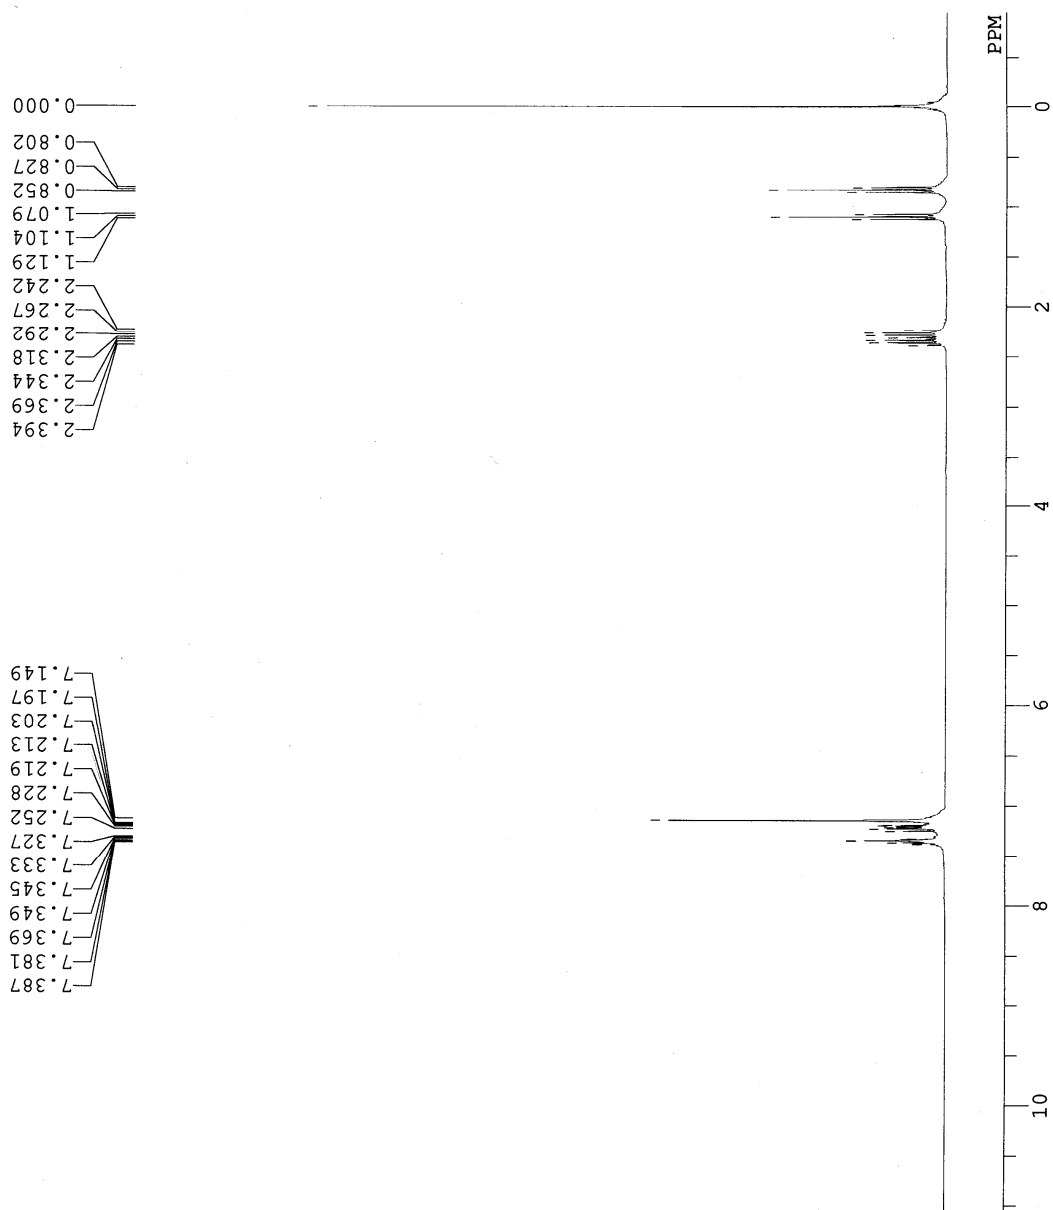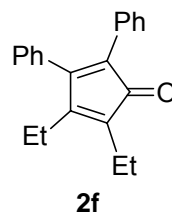

D:\LUO QIAN\2-19\SUB2-C-102

DFILE  
COMNT  
DATIM  
OBNUC  
EXMOD  
OBFRO  
OBSET  
OBFIN  
POINT  
FREQU  
SCANS  
ACQTM  
PD  
PW1  
IRNUC  
CTEMP  
SLVNT  
EXREF  
BF  
RGAIN

Tue Mar 20 23:58:25 2007  
13C  
BCM  
75.45 MHz  
124.00 KHZ  
1840.0 Hz  
32768  
20408.1 Hz  
1024  
1.606 sec  
1.394 sec  
5.0 us  
1H  
25.3 C  
CDCL3  
0.00 ppm  
0.62 Hz  
26

19.590  
16.220  
14.448  
13.088  
0.000

77.438  
77.018  
76.598

157.481  
154.053  
134.520  
131.001  
129.649  
128.627  
128.215  
128.166  
127.861  
127.350  
126.954  
124.787

202.555

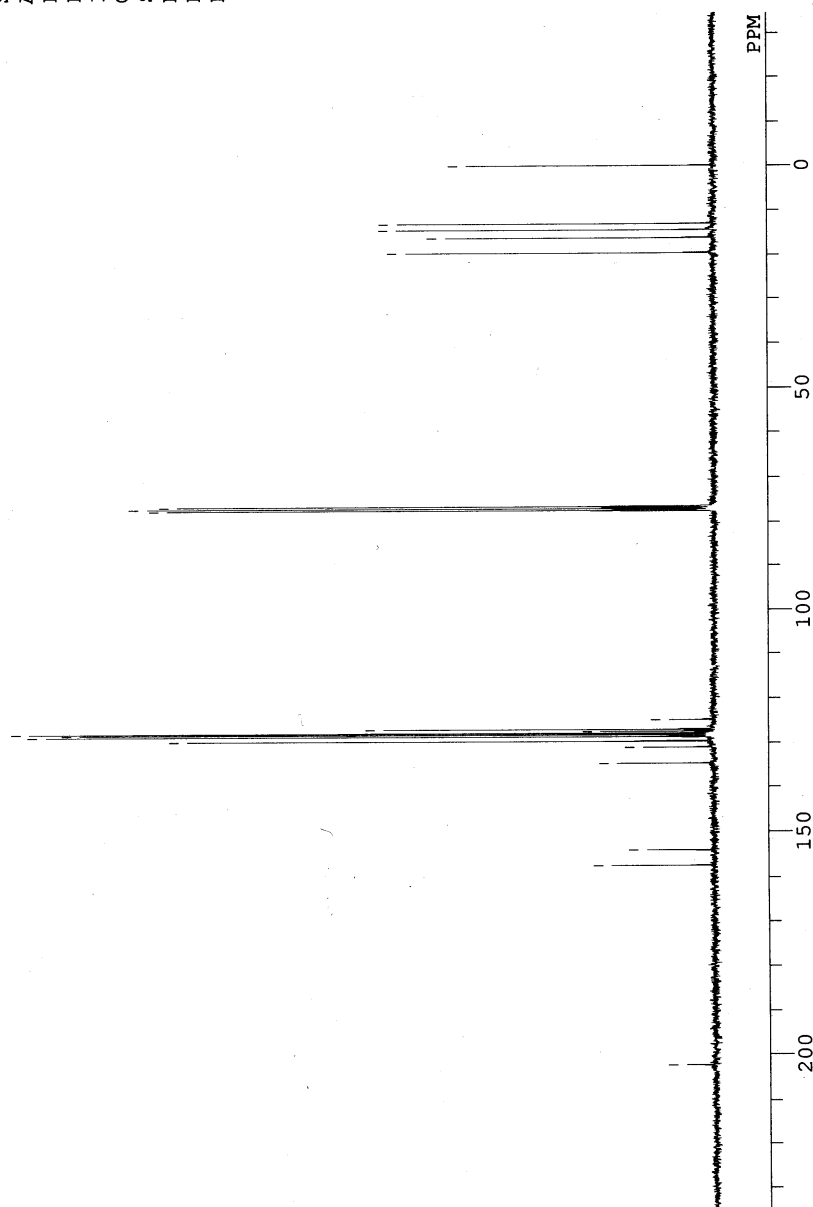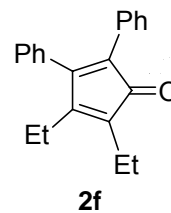

**3. X-ray crystallographic studies of 3a and 3d:** Crystals for X-ray analyses of **3a** and **3d** were obtained as described in the preparations. The crystals were sealed in thin-walled glass capillaries. Data collections were performed at 20 °C on a Rigaku RAXIS RAPID IP, using graphite-monochromated Mo K $\alpha$  radiation ( $\lambda = 0.71073$  Å). The determination of crystal class and unit cell parameters was carried out by the SMART program package. The raw frame data were processed using SAINT and SADABS to yield the reflection data file. These structures were solved by use of SHELXTL program. Refinement was performed on  $F^2$  anisotropically for all the non-hydrogen atoms by the full-matrix least-squares method. The hydrogen atoms were placed at the calculated positions and were included in the structure calculation without further refinement of the parameters. Crystallographic data (excluding structure factors) have been deposited with the Cambridge Crystallographic Data Centre as supplementary publication nos. CCDC-668730 (**3a**) and CCDC-668731. Copies of these data can be obtained free of charge from the Cambridge Crystallographic Data Centre via [www.ccdc.cam.ac.uk/data\\_request/cif](http://www.ccdc.cam.ac.uk/data_request/cif).

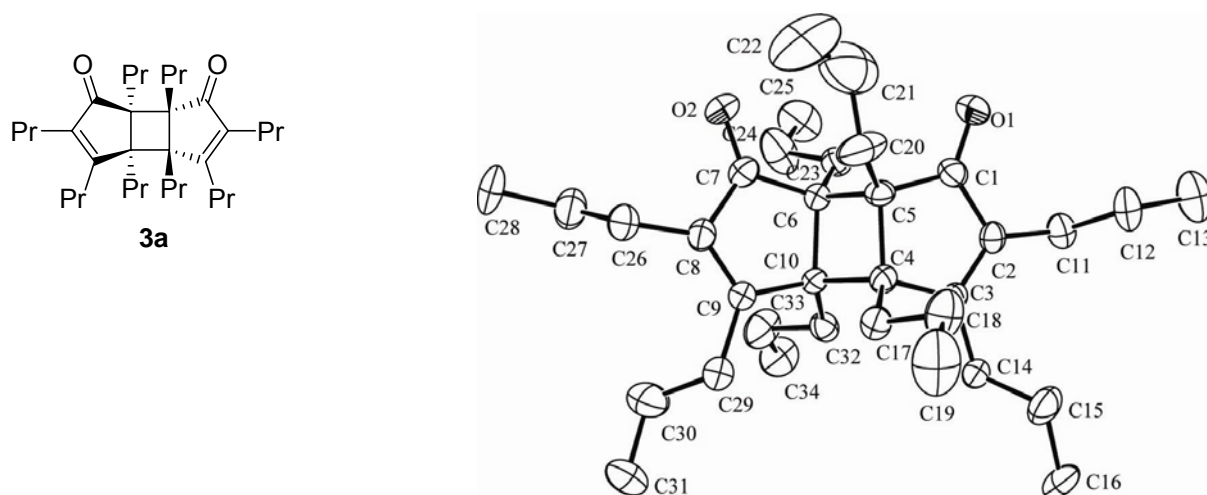

**E**Fig. 1 ORTEP drawing of **3a** with 30% thermal ellipsoids.

**Table 1.** Crystal data and structure refinement for **3a**.

|                     |                                                |
|---------------------|------------------------------------------------|
| Identification code | <b>3a</b>                                      |
| CCDC number         | 668730                                         |
| Empirical formula   | C <sub>34</sub> H <sub>56</sub> O <sub>2</sub> |

|                                                     |                                                                                                         |
|-----------------------------------------------------|---------------------------------------------------------------------------------------------------------|
| Formula weight                                      | 496.79                                                                                                  |
| Temperature                                         | 293(2) K                                                                                                |
| Wavelength                                          | 0.71073 Å                                                                                               |
| Crystal system, space group                         | Orthorhombic, Aba2                                                                                      |
| Unit cell dimensions                                | a = 19.655(4) Å    alpha = 90 °.<br>b = 20.326(4) Å    beta = 90 °.<br>c = 16.036(3) Å    gamma = 90 °. |
| Volume                                              | 6407(2) Å <sup>3</sup>                                                                                  |
| Refls. No. for cell measurement                     | 11916                                                                                                   |
| Theta range for cell measurement                    | 1.92 to 25.02 °.                                                                                        |
| Z, Calculated density                               | 8, 1.030 Mg/m <sup>3</sup>                                                                              |
| Absorption coefficient                              | 0.061 mm <sup>-1</sup>                                                                                  |
| F(000)                                              | 2208                                                                                                    |
| Crystal shape / Crystal colour                      | block / colourless                                                                                      |
| Crystal size                                        | 0.45 x 0.20 x 0.18 mm                                                                                   |
| Theta range for data collection                     | 1.92 to 25.02 °.                                                                                        |
| Limiting indices                                    | -23 ≤ h ≤ 23, -24 ≤ k ≤ 24, -19 ≤ l ≤ 19                                                                |
| Reflections collected / unique                      | 11916 / 2929 [ <i>R</i> <sub>(int)</sub> = 0.0506]                                                      |
| Reflections with <i>I</i> > 2σ( <i>I</i> )          | 1209                                                                                                    |
| Completeness to theta = 25.02 °                     | 99.6 %                                                                                                  |
| Decay correction (%)                                | 0                                                                                                       |
| Absorption correction                               | Empirical                                                                                               |
| Max. and min. transmission                          | 0.989 and 0.973                                                                                         |
| Method for primary solution                         | direct                                                                                                  |
| Method for secondary solution                       | difmap                                                                                                  |
| Hydrogen addition / treatment                       | geom / constr                                                                                           |
| Refinement method                                   | Full-matrix least-squares on <i>F</i> <sup>2</sup>                                                      |
| Data / restraints / parameters                      | 2929 / 2 / 334                                                                                          |
| Goodness-of-fit on <i>F</i> <sup>2</sup>            | 0.985                                                                                                   |
| Final <i>R</i> indices [ <i>I</i> > 2σ( <i>I</i> )] | <i>R</i> <sub>1</sub> = 0.0527, <i>wR</i> <sub>2</sub> = 0.1108                                         |
| <i>R</i> indices (all data)                         | <i>R</i> <sub>1</sub> = 0.1280, <i>wR</i> <sub>2</sub> = 0.1210                                         |
| Absolute structure parameter                        | -1(3)                                                                                                   |
| Extinction coefficient                              | 0.0044(2)                                                                                               |
| Largest diff. peak and hole                         | 0.398 and -0.167 e.Å <sup>-3</sup>                                                                      |
| Max. and mean shift/sigma                           | 0.000 and 0.000                                                                                         |
| Measurement device                                  | Rigaku RAXIS RAPID IP                                                                                   |
| Measurement method                                  | \W                                                                                                      |
| Program for data collection                         | Rapid-AUTO (Rigaku, 2000)                                                                               |
| Program for cell refinement                         | Rapid-AUTO                                                                                              |
| Program for data reduction                          | CrystalStructure (Rigaku/MS, 2000)                                                                      |
| Program for structure solution                      | SHELXS-97, (Sheldrick, 1997)                                                                            |
| Program for structure refinement                    | SHELXL-97, (Sheldrick, 1997)                                                                            |
| Program for molecular graphics                      | Siemens SHELXTL V4.2, (Sheldrick, 1990)                                                                 |
| Program for publication material                    | SHELXL-97, (Sheldrick, 1997)                                                                            |

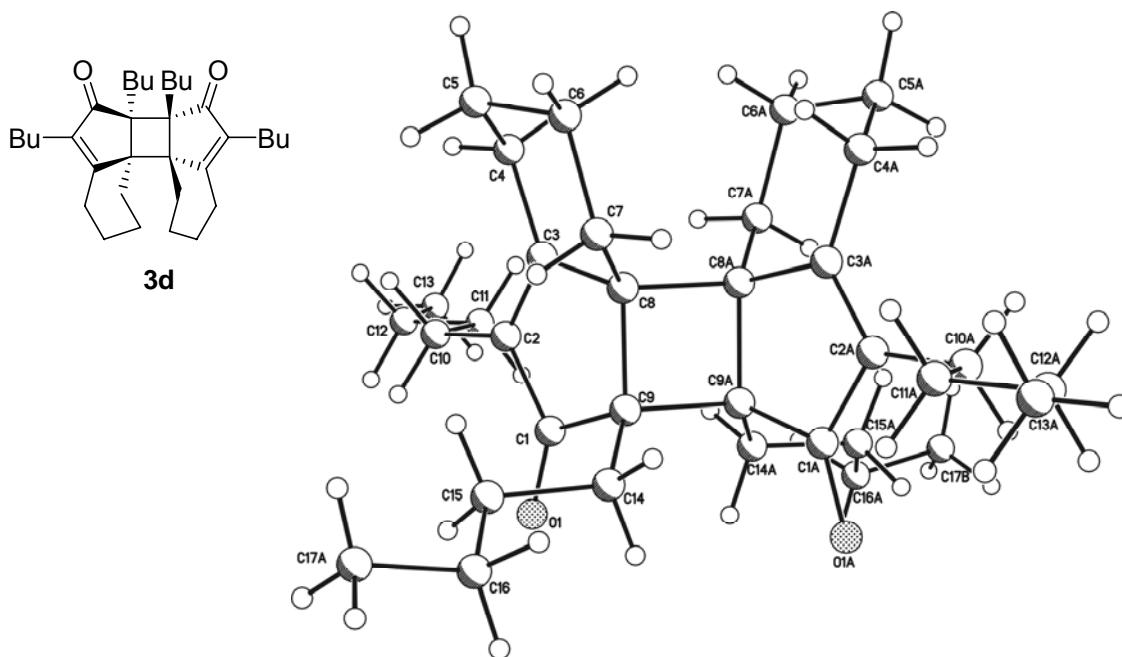

**Fig. 2** ORTEP drawing of **3d** with 30% thermal ellipsoids ( $A = 1-x, y, 1/2-z$ ).

**Table 5.** Crystal data and structure refinement for **3d**.

|                                        |                                                                                                                                      |
|----------------------------------------|--------------------------------------------------------------------------------------------------------------------------------------|
| Identification code                    | <b>3d</b>                                                                                                                            |
| CCDC number                            | 668731                                                                                                                               |
| Empirical formula                      | $C_{34}H_{52}O$                                                                                                                      |
| Formula weight                         | 492.76                                                                                                                               |
| Temperature                            | 293(2) K                                                                                                                             |
| Wavelength                             | 0.71073 Å                                                                                                                            |
| Crystal system, space group            | Monoclinic, $C2/c$                                                                                                                   |
| Unit cell dimensions                   | $a = 22.715(5)$ Å $\alpha = 90^\circ$ .<br>$b = 8.6051(17)$ Å $\beta = 109.25(3)^\circ$ .<br>$c = 16.731(3)$ Å $\gamma = 90^\circ$ . |
| Volume                                 | $3087.4(11)$ Å <sup>3</sup>                                                                                                          |
| Refls. No. for cell measurement        | 7422                                                                                                                                 |
| Theta range for cell measurement       | 2.55 to 25.03 °.                                                                                                                     |
| Z, Calculated density                  | 4, 1.060 Mg/m <sup>3</sup>                                                                                                           |
| Absorption coefficient                 | 0.063 mm <sup>-1</sup>                                                                                                               |
| F(000)                                 | 1088                                                                                                                                 |
| Crystal shape / Crystal colour         | block / colourless                                                                                                                   |
| Crystal size                           | 0.35 x 0.30 x 0.12 mm                                                                                                                |
| Theta range for data collection        | 2.55 to 25.03 °.                                                                                                                     |
| Limiting indices                       | $0 \leq h \leq 26$ , $0 \leq k \leq 10$ , $-19 \leq l \leq 18$                                                                       |
| Reflections collected / unique         | 7422 / 2700 [ $R_{int} = 0.0461$ ]                                                                                                   |
| Reflections with $I > 2\sigma(I)$      | 923                                                                                                                                  |
| Completeness to $\theta = 25.03^\circ$ | 98.7 %                                                                                                                               |

|                                   |                                                   |
|-----------------------------------|---------------------------------------------------|
| Decay correction (%)              | 0                                                 |
| Absorption correction             | Empirical                                         |
| Max. and min. transmission        | 0.992 and 0.978                                   |
| Method for primary solution       | direct                                            |
| Method for secondary solution     | difmap                                            |
| Hydrogen addition / treatment     | geom / constr                                     |
| Refinement method                 | Full-matrix least-squares on F <sup>2</sup>       |
| Data / restraints / parameters    | 2700 / 7 / 174                                    |
| Goodness-of-fit on F <sup>2</sup> | 1.037                                             |
| Final R indices [I>2sigma(I)]     | R <sub>1</sub> = 0.0685, wR <sub>2</sub> = 0.1558 |
| R indices (all data)              | R <sub>1</sub> = 0.1758, wR <sub>2</sub> = 0.1757 |
| Extinction coefficient            | 0.0024(4)                                         |
| Largest diff. peak and hole       | 0.296 and -0.168 e.Å <sup>-3</sup>                |
| Max. and mean shift/sigma         | 0.000 and 0.000                                   |
| Measurement device                | Rigaku RAXIS RAPID IP                             |
| Measurement method                | \W                                                |
| Program for data collection       | Rapid-AUTO (Rigaku, 2000)                         |
| Program for cell refinement       | Rapid-AUTO                                        |
| Program for data reduction        | CrystalStructure (Rigaku/MSK, 2000)               |
| Program for structure solution    | SHELXS-97, (Sheldrick, 1997)                      |
| Program for structure refinement  | SHELXL-97, (Sheldrick, 1997)                      |
| Program for molecular graphics    | Siemens SHELXTL V4.2, (Sheldrick, 1990)           |
| Program for publication material  | SHELXL-97, (Sheldrick, 1997)                      |
